# Supplementary material
Source: Springer Nature journal article supplement (https://www.springermedizin.de/resource/supplementary/12865_2010_342_MOESM4_ESM.pdf/9427792)

# Apolipoprotein B

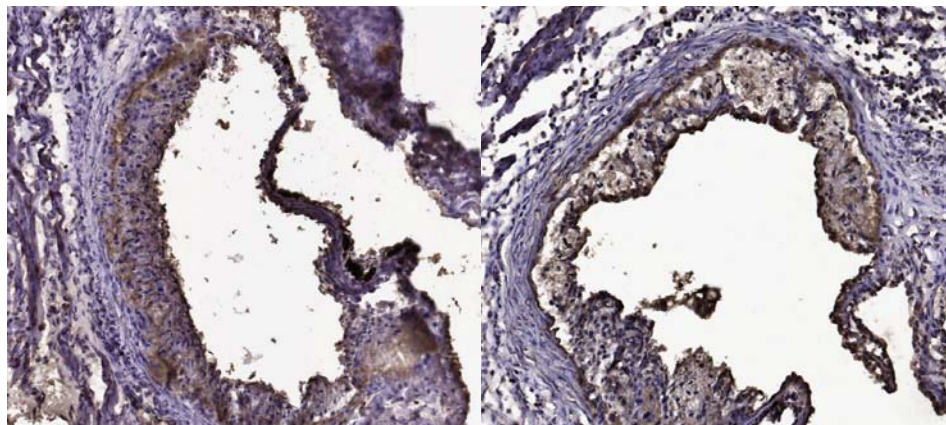

Chow 4 weeks

HFD 4 weeks

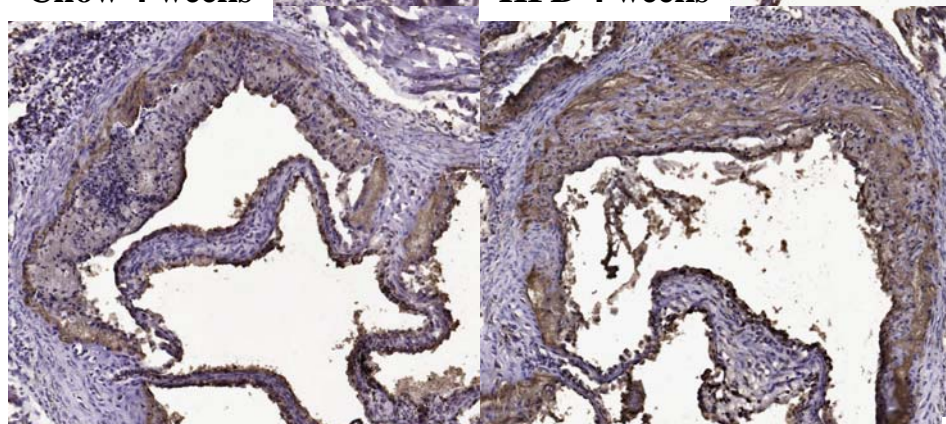

Chow 8 weeks

HFD 8 weeks

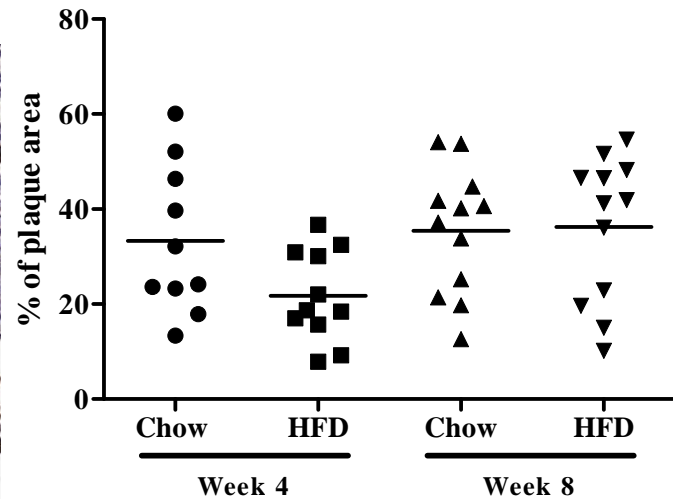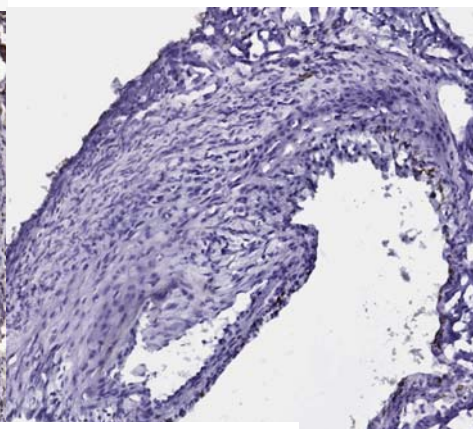

Negative control

Supplement: MOESM4 [file 9427792]
